# Supplementary material for: Multi-omics analysis reveals epithelial-mesenchymal transition-related gene FOXM1 as a novel prognostic biomarker in clear cell renal carcinoma
Source: Aging (Albany NY). 2019 Nov 19;11(22):10316–37. doi: 10.18632/aging.102459 (PMC6914426; doi:10.18632/aging.102459)
Supplement: Supplementary Figures [file aging-11-102459-s011..pdf]

## SUPPLEMENTARY FIGURES

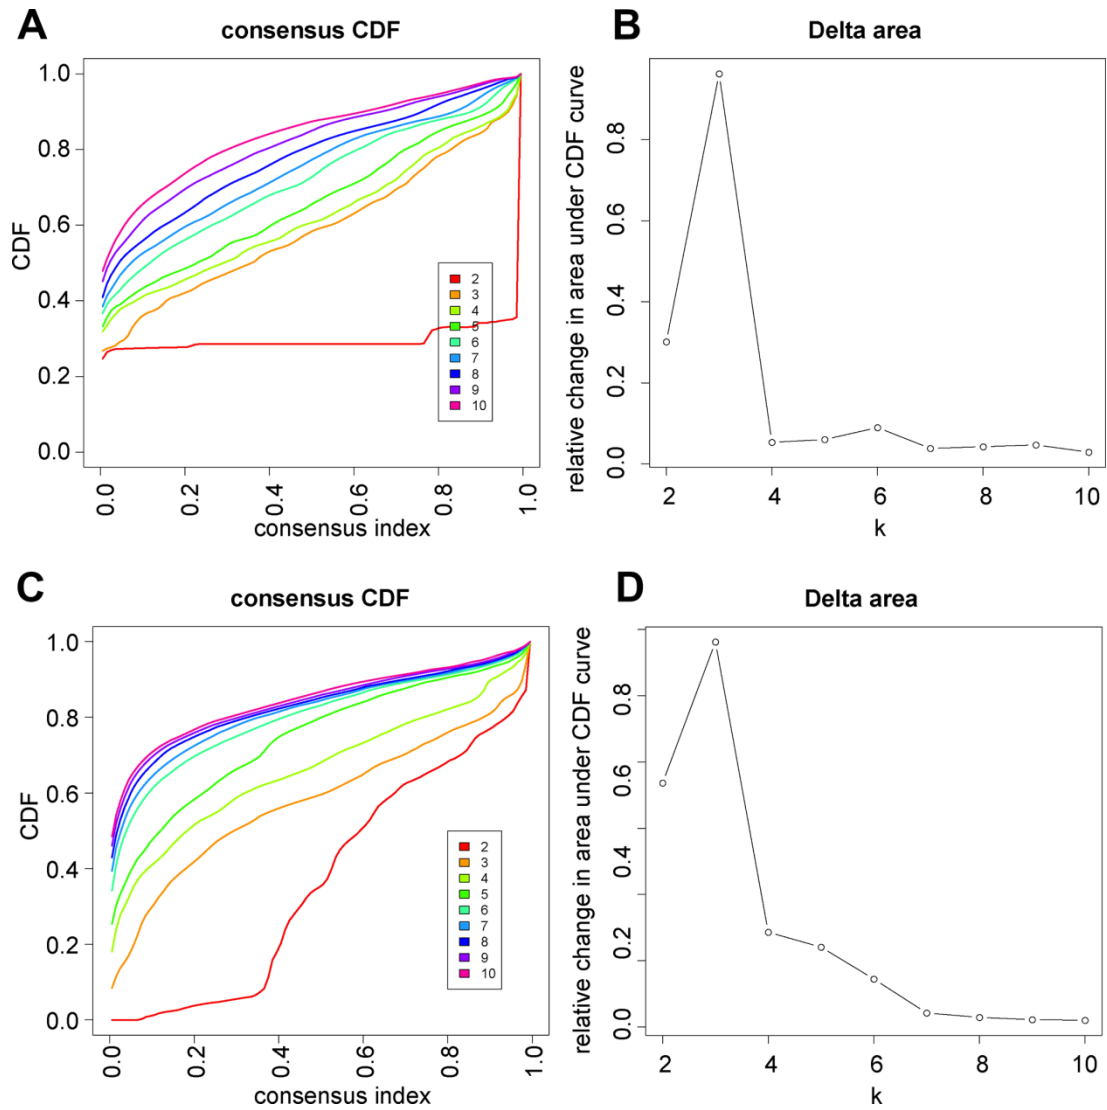

**Supplementary Figure 1. Consensus clustering of expression of EMT-related genes using Euclidean as distance metric with Ward linkage.** (A) and (C) Consensus Cumulative Distribution Function (CDF) plots to determine at what number of clusters,  $k$ , the CDF reaches an approximate maximum. (B) and (D) Delta area plots show the relative change in area under the CDF curve comparing  $k$  and  $k-1$ . They showed that the delta areas had no appreciable increase when  $k=4$  and  $k=7$  for sample clustering (B) and gene clustering (D), respectively.

|                  | Ontology | ID         | Description                                                       | P.adjust | Gene ID                                             |                                        |
|------------------|----------|------------|-------------------------------------------------------------------|----------|-----------------------------------------------------|----------------------------------------|
| Hypomethylation  | MF       | GO:0001227 | transcriptional repressor activity, RNA polymerase II             | *        | FOXM1/TCF3/ZEB1                                     | <u>Promoter binding</u>                |
|                  | MF       | GO:0000978 | transcription regulatory region sequence-specific DNA binding     | **       | IRF4/MYBL2/NFKB2/TCF3/TP73/ZEB1                     |                                        |
|                  | MF       | GO:0070888 | RNA polymerase II proximal promoter sequence-specific DNA binding | *        | TCF3/ZEB1                                           |                                        |
|                  | BP       | GO:0007050 | E-box binding                                                     | **       | ATM/CCND1/CDK5R1/FOXM1/TP73                         | <u>Cell cycle</u>                      |
|                  | BP       | GO:0045931 | cell cycle arrest                                                 | *        | CCND1/SPHK1/TGFA                                    |                                        |
|                  | BP       | GO:0045787 | positive regulation of mitotic cell cycle                         | **       | ATM/CCND1/CDK5R1/SPHK1/TGFA/TP73                    |                                        |
|                  | BP       | GO:0048285 | positive regulation of cell cycle                                 | *        | ATM/KDR/MKI67/MYBL2/TGFA                            |                                        |
|                  | BP       | GO:0140014 | organelle fission                                                 | *        | ATM/MKI67/MYBL2/TGFA                                |                                        |
|                  | BP       | GO:0018105 | mitotic nuclear division                                          | *        | ATM/CDK5R1/DCLK1/EPO                                | <u>(auto)phosphorylation</u>           |
|                  | MF       | GO:0035004 | peptidyl-serine phosphorylation                                   | *        | ATM/FYN                                             |                                        |
|                  | BP       | GO:0071902 | phosphatidylinositol 3-kinase activity                            | *        | CCND1/CDK5R1/ROBO1/TGFA/TP73                        |                                        |
|                  | BP       | GO:0046425 | positive regulation of protein serine/threonine kinase activity   | *        | CDK5R1/EPO/FYN                                      |                                        |
|                  | BP       | GO:0050731 | regulation of JAK-STAT cascade                                    | **       | EPO/FYN/TGFA/TNK2                                   |                                        |
|                  | BP       | GO:0038083 | positive regulation of peptidyl-tyrosine phosphorylation          | **       | FYN/KDR/TNK2                                        |                                        |
|                  | BP       | GO:0050673 | peptidyl-tyrosine autophosphorylation                             | *        | CCND1/KDR/ROBO1/RUNX3/TGFA                          | <u>Epithelial cell proliferation</u>   |
|                  | BP       | GO:0050679 | epithelial cell proliferation                                     | *        | CCND1/KDR/TGFA                                      |                                        |
|                  | BP       | GO:0033598 | positive regulation of epithelial cell proliferation              | *        | CCND1/ROBO1                                         |                                        |
|                  | BP       | GO:0030857 | mammary gland epithelial cell proliferation                       | *        | CCND1/ZEB1                                          | <u>Epithelial cell differentiation</u> |
| Hypermethylation | BP       | GO:0007162 | negative regulation of epithelial cell differentiation            | *        | CDH1/CLDN7/EPCAM/ERBB2/MUC1/RHOA                    | <u>Cell junction</u>                   |
|                  | CC       | GO:0005911 | negative regulation of cell adhesion                              | **       | CDH1/CLDN7/EPCAM/GRHL2/OCN/RHOA/TJP1/TJP2           |                                        |
|                  | CC       | GO:0043296 | cell-cell junction                                                | ***      | CDH1/CLDN7/EPCAM/OCN/RHOA/TJP1/TJP2                 |                                        |
|                  | BP       | GO:0045216 | apical junction complex                                           | *        | CDH1/GRHL2/ITGA2/OCN/RHOA/TJP1                      |                                        |
|                  | BP       | GO:0007160 | cell-cell junction organization                                   | **       | CDK6/DDR1/GSK3B/ITGA2/RHOA                          |                                        |
|                  | BP       | GO:0046777 | cell-matrix adhesion                                              | *        | BCR/CAMK2G/DDR1/ERBB2/GSK3B/MTOR/NIK2               | <u>(auto)phosphorylation</u>           |
|                  | BP       | GO:0018108 | protein autophosphorylation                                       | *        | BCR/DDR1/ERBB2/HDAC1/IL11/MTOR                      |                                        |
|                  | BP       | GO:0018105 | peptidyl-tyrosine phosphorylation                                 | *        | CAMK2G/CHUK/GSK3B/IL11/MAPK8/MTOR                   |                                        |
|                  | BP       | GO:0018105 | peptidyl-serine phosphorylation                                   | *        | CAMK2G/GSK3B/MAPK8/MTOR                             |                                        |
|                  | BP       | GO:0018107 | peptidyl-threonine phosphorylation                                | *        | CDK6/CDKN1C/DUSP6/FOXO1/MECOM/MTOR/RHOA/SMAD4/SOCS2 |                                        |
|                  | BP       | GO:0042326 | negative regulation of phosphorylation                            | *        | HDAC1/MUC1/SMAD4                                    | <u>Histone modification</u>            |
|                  | BP       | GO:2000756 | regulation of peptidyl-lysine acetylation                         | *        | HDAC1/MAPK8/MECOM/MUC1/RNF8/SETD2/SMAD4             |                                        |
|                  | BP       | GO:0016570 | histone modification                                              | *        |                                                     |                                        |

**Supplementary Figure 2. Gene ontology enrichment for expression quantitative trait methylation (eQTM).**

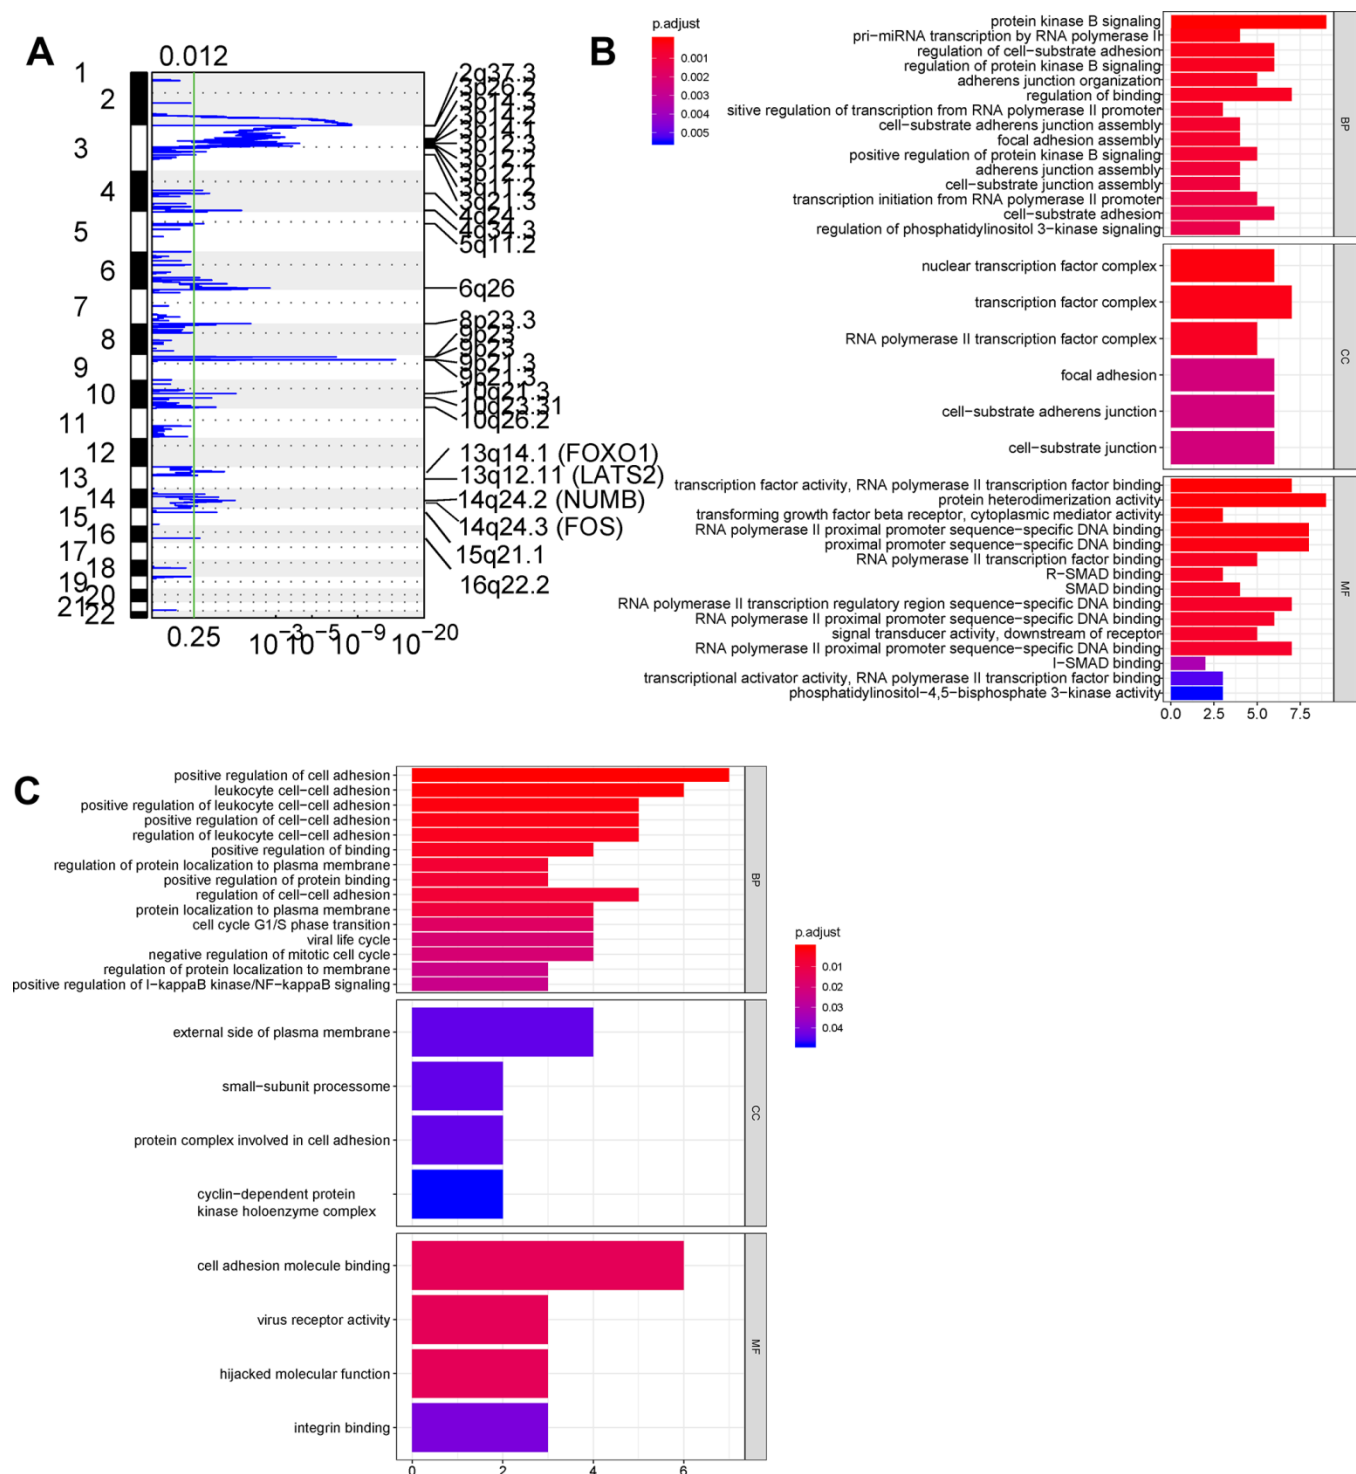

**Supplementary Figure 3. Frequent deleted areas of ccRCC genome and involved functions of expression quantitative trait copy number (eQTCNs).** (A) The EDCGs located in the focal CN deletion peaks. False-discovery rates (q values) and scores generated by GISTIC 2.0 for amplifications (x-axis) are plotted against chromosome locations (y-axis). Dotted lines indicate the centromeres. The green line represents cut-off ( $q = 0.25$ ) that determines statistical significance. (B) Deleted EDCGs involve GO functions. (C) Amplified EDCGs involve GO functions.
