# Supplementary material for: Multi-omics analysis reveals epithelial-mesenchymal transition-related gene FOXM1 as a novel prognostic biomarker in clear cell renal carcinoma
Source: publisher site journal article supplement (doi:10.18632/aging.102459), 2019-11-19
Supplement: Supplementary file [file aging-v11i22-102459-supplementary-material-SD3.pdf]

## SUPPLEMENTARY CODE

Please browse Full Text version to see the data of Supplementary Code.

**Supplementary Code.** (i) the code (Perl language) used to perform text mining in order to extract raw EMT related genes/proteins from Pubmed query xml results; (ii) the code (R language) for unsupervised clustering analysis based on expression levels of 756 EMT-related genes using multiple R packages; (iii) the code (Perl language) of our custom Perl functions to perform batch effect evaluation using MBatch v1.0 software; (iv) the code (Perl language) used to perform expression quantitative trait methylation (eQTM) and expression quantitative trait copy number alterations (eQTCN) analysis.
